# Supplementary material for: Ancient human genome-wide data from a 3000-year interval in the Caucasus corresponds with eco-geographic regions
Source: PubMed Central journal article supplement (PMC6360191; doi:10.1038/s41467-018-08220-8), 2019-02-04
Supplement: 41467_2018_8220_MOESM3_ESM.pdf [file 41467_2018_8220_MOESM3_ESM.pdf]

**Supplementary Data 1.** Summary of contextual archaeological and laboratory information for all newly analyzed prehistoric individuals in this study.

**Supplementary Data 2.** Summary of comparative ancient and modern datasets used in this study.

**Supplementary Data 3.** Full ADMIXTURE results from all ancient and relevant modern populations (k=2 to k=18).
